# Supplementary material
Source: Springer Nature journal article supplement (https://www.springermedizin.de/resource/supplementary/12911_2013_806_MOESM2_ESM.pdf/9526692)

# OPD Reporting Rates

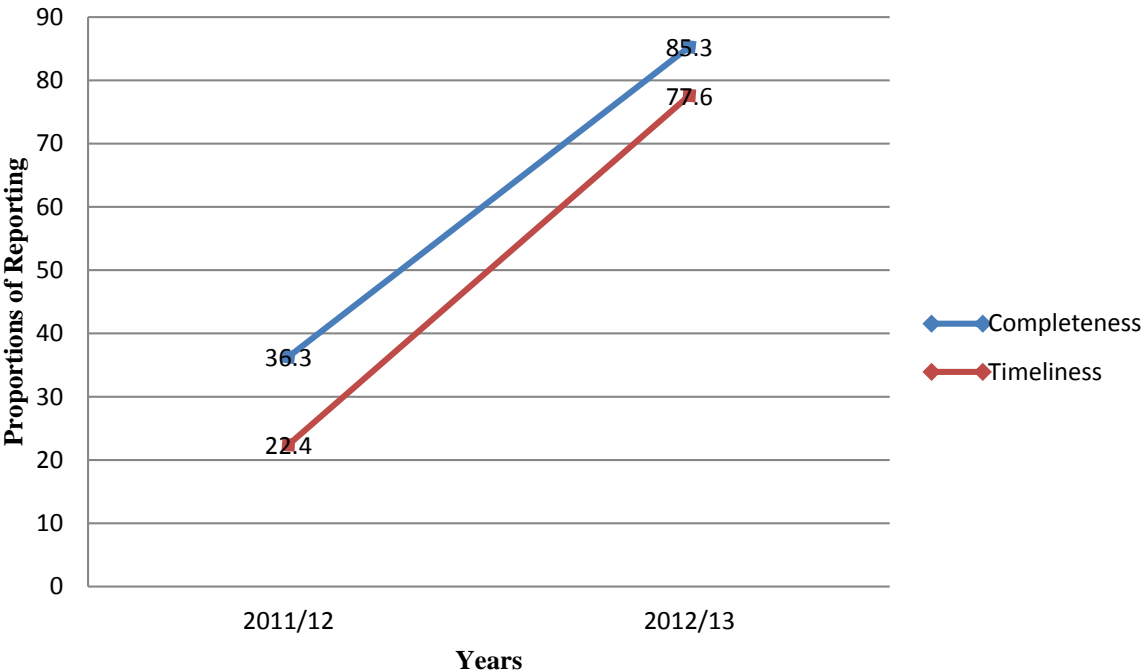

Supplement: MOESM2 [file 9526692]
